# Supplementary material
Source: PubMed Central journal article supplement (PMC4835295)
Supplement: supp_150901_150901-res-4-at.pdf [file supp_150901_150901-res-4-at.pdf]

**Appendix 4 (as supplied by the authors):** Standard daily drug doses for the treatment of respiratory tract infections\*

| <b>Drug</b>                      | <b>Standard daily doses (mg)</b> |
|----------------------------------|----------------------------------|
| <b>Macrolide antibiotics</b>     |                                  |
| Azithromycin                     | 250 to 500                       |
| Clarithromycin                   | 500 to 1,000                     |
| Erythromycin                     | 500 to 2,000                     |
| <b>Non-macrolide antibiotics</b> |                                  |
| Amoxicillin                      | 750 to 1,750                     |
| Cefuroxime                       | 500 to 1,000                     |
| Levofloxacin                     | 500 to 750                       |

\*Prescriptions for any daily drug doses that are not standard for the treatment of respiratory tract infections were excluded from our two groups to ensure generalizability to usual prescribing.
