# Supplementary material
Source: PubMed Central journal article supplement (PMC4835295)
Supplement: supp_150901_150901-res-8-at.pdf [file supp_150901_150901-res-8-at.pdf]

**Appendix 8 (as supplied by the authors):** Baseline characteristics of macrolide antibiotic (azithromycin, clarithromycin or erythromycin) users and non-macrolide antibiotic (amoxicillin, cefuroxime or levofloxacin) users pre- and post-match\* (all 106 baseline characteristics)

| Variable                      | Unmatched                  |                                |                             | Matched                    |                                |                             |
|-------------------------------|----------------------------|--------------------------------|-----------------------------|----------------------------|--------------------------------|-----------------------------|
|                               | Macrolide<br>(n = 616,359) | Non-Macrolide<br>(n = 705,132) | Standardized<br>Difference† | Macrolide<br>(n = 503,612) | Non-Macrolide<br>(n = 503,612) | Standardized<br>Difference† |
| <b>Demographics</b>           |                            |                                |                             |                            |                                |                             |
| Age, mean (SD), years         | 73.7 (7.1)                 | 74.1 (7.3)                     | 6%                          | 73.9 (7.2)                 | 74.0 (7.2)                     | 2%                          |
| Women                         | 359,895 (58.4)             | 389,520 (55.2)                 | 6%                          | 288,515 (57.3)             | 288,473 (57.3)                 | 0%                          |
| Income quintile‡              |                            |                                |                             |                            |                                |                             |
| 1 (low)                       | 120,433 (19.5)             | 135,873 (19.3)                 | 1%                          | 99,340 (19.7)              | 100,535 (20.0)                 | 1%                          |
| 2                             | 128,791 (20.9)             | 147,680 (20.9)                 | 0%                          | 106,101 (21.1)             | 106,738 (21.2)                 | 0%                          |
| 3 (middle)                    | 121,353 (19.7)             | 139,156 (19.7)                 | 0%                          | 101,012 (20.1)             | 101,455 (20.1)                 | 0%                          |
| 4                             | 120,224 (19.5)             | 138,126 (19.6)                 | 0%                          | 97,895 (19.4)              | 97,247 (19.3)                  | 0%                          |
| 5 (high)                      | 123,398 (20.0)             | 141,829 (20.1)                 | 0%                          | 99,264 (19.7)              | 97,637 (19.4)                  | 1%                          |
| Year of cohort entry          |                            |                                |                             |                            |                                |                             |
| 2002                          | 71,875 (11.7)              | 71,491 (10.1)                  | 5%                          | 56,548 (11.2)              | 56,434 (11.2)                  | 0%                          |
| 2003                          | 89,014 (14.4)              | 86,440 (12.3)                  | 6%                          | 69,300 (13.8)              | 68,989 (13.7)                  | 0%                          |
| 2004                          | 70,341 (11.4)              | 71,392 (10.1)                  | 4%                          | 55,248 (11.0)              | 55,193 (11.0)                  | 0%                          |
| 2005                          | 63,839 (10.4)              | 66,701 (9.5)                   | 3%                          | 50,803 (10.1)              | 51,007 (10.1)                  | 0%                          |
| 2006                          | 51,400 (8.3)               | 59,498 (8.4)                   | 0%                          | 42,229 (8.4)               | 42,502 (8.4)                   | 0%                          |
| 2007                          | 46,988 (7.6)               | 55,608 (7.9)                   | 1%                          | 38,824 (7.7)               | 38,995 (7.7)                   | 0%                          |
| 2008                          | 46,180 (7.5)               | 54,246 (7.7)                   | 1%                          | 37,802 (7.5)               | 37,898 (7.5)                   | 0%                          |
| 2009                          | 41,919 (6.8)               | 53,244 (7.6)                   | 3%                          | 35,205 (7.0)               | 35,175 (7.0)                   | 0%                          |
| 2010                          | 42,552 (6.9)               | 55,593 (7.9)                   | 4%                          | 35,973 (7.1)               | 35,860 (7.1)                   | 0%                          |
| 2011                          | 41,502 (6.7)               | 58,617 (8.3)                   | 6%                          | 36,529 (7.3)               | 36,470 (7.2)                   | 0%                          |
| 2012                          | 41,276 (6.7)               | 60,475 (8.6)                   | 7%                          | 37,075 (7.4)               | 37,011 (7.3)                   | 0%                          |
| 2013                          | 9,473 (1.5)                | 11,827 (1.7)                   | 1%                          | 8,076 (1.6)                | 8,078 (1.6)                    | 0%                          |
| Rural residence§              | 87,490 (14.2)              | 89,820 (12.7)                  | 4%                          | 68,952 (13.7)              | 67,861 (13.5)                  | 1%                          |
| Long-term care                | 20,921 (3.4)               | 37,020 (5.3)                   | 9%                          | 20,538 (4.1)               | 23,129 (4.6)                   | 3%                          |
| LHIN                          |                            |                                |                             |                            |                                |                             |
| 1                             | 71,875 (11.7)              | 71,491 (10.1)                  | 5%                          | 56,548 (11.2)              | 56,434 (11.2)                  | 0%                          |
| 2                             | 89,014 (14.4)              | 86,440 (12.3)                  | 6%                          | 69,300 (13.8)              | 68,989 (13.7)                  | 0%                          |
| 3                             | 70,341 (11.4)              | 71,392 (10.1)                  | 4%                          | 55,248 (11.0)              | 55,193 (11.0)                  | 0%                          |
| 4                             | 63,839 (10.4)              | 66,701 (9.5)                   | 3%                          | 50,803 (10.1)              | 51,007 (10.1)                  | 0%                          |
| 5                             | 51,400 (8.3)               | 59,498 (8.4)                   | 0%                          | 42,229 (8.4)               | 42,502 (8.4)                   | 0%                          |
| 6                             | 46,988 (7.6)               | 55,608 (7.9)                   | 1%                          | 38,824 (7.7)               | 38,995 (7.7)                   | 0%                          |
| 7                             | 46,180 (7.5)               | 54,246 (7.7)                   | 1%                          | 37,802 (7.5)               | 37,898 (7.5)                   | 0%                          |
| 8                             | 41,919 (6.8)               | 53,244 (7.6)                   | 3%                          | 35,205 (7.0)               | 35,175 (7.0)                   | 0%                          |
| 9                             | 42,552 (6.9)               | 55,593 (7.9)                   | 4%                          | 35,973 (7.1)               | 35,860 (7.1)                   | 0%                          |
| 10                            | 41,502 (6.7)               | 58,617 (8.3)                   | 6%                          | 36,529 (7.3)               | 36,470 (7.2)                   | 0%                          |
| 11                            | 41,276 (6.7)               | 60,475 (8.6)                   | 7%                          | 37,075 (7.4)               | 37,011 (7.3)                   | 0%                          |
| 12                            | 9,473 (1.5)                | 11,827 (1.7)                   | 1%                          | 8,076 (1.6)                | 8,078 (1.6)                    | 0%                          |
| 13                            | 71,875 (11.7)              | 71,491 (10.1)                  | 5%                          | 56,548 (11.2)              | 56,434 (11.2)                  | 0%                          |
| 14                            | 89,014 (14.4)              | 86,440 (12.3)                  | 6%                          | 69,300 (13.8)              | 68,989 (13.7)                  | 0%                          |
| <b>Prescribing physician¶</b> |                            |                                |                             |                            |                                |                             |
| General practitioner          | 474,660 (77.0)             | 398,920 (56.6)                 | 44%                         | 367,302 (72.9)             | 368,847 (73.2)                 | 1%                          |
| Internist                     | 2,797 (0.5)                | 2,967 (0.4)                    | 1%                          | 2,461 (0.5)                | 2,611 (0.5)                    | 0%                          |

|                                             |                |                |     |                |                |    |
|---------------------------------------------|----------------|----------------|-----|----------------|----------------|----|
| Nephrologist                                | 802 (0.1)      | 788 (0.1)      | 1%  | 749 (0.1)      | 626 (0.1)      | 1% |
| Cardiologist                                | 856 (0.1)      | 1,146 (0.2)    | 1%  | 813 (0.2)      | 909 (0.2)      | 0% |
| Other                                       | 37,133 (6.0%)  | 38,396 (5.4)   | 2%  | 32,194 (6.4)   | 34,646 (6.9)   | 2% |
| <b>Comorbidities**</b>                      |                |                |     |                |                |    |
| Dementia                                    | 46,958 (7.6)   | 68,671 (9.7)   | 8%  | 42,887 (8.5)   | 45,532 (9.0)   | 2% |
| Schizophrenia or other psychotic disorders  | 12,614 (2.0)   | 17,771 (2.5)   | 3%  | 11,363 (2.3)   | 11,985 (2.4)   | 1% |
| Bipolar disorder                            | 9,964 (1.6)    | 12,986 (1.8)   | 2%  | 8,645 (1.7)    | 8,764 (1.7)    | 0% |
| Unipolar depression and/or anxiety disorder | 46,254 (7.5)   | 53,089 (7.5)   | 0%  | 38,397 (7.6)   | 38,481 (7.6)   | 0% |
| Haemorrhagic stroke                         | 1,056 (0.2)    | 1,556 (0.2)    | 1%  | 957 (0.2)      | 990 (0.2)      | 0% |
| Ischemic stroke                             | 6,544 (1.1)    | 9,804 (1.4)    | 3%  | 6,005 (1.2)    | 6,366 (1.3)    | 1% |
| TIA                                         | 2,545 (0.4)    | 3,475 (0.5)    | 1%  | 2,263 (0.4)    | 2,363 (0.5)    | 0% |
| Chronic liver disease                       | 19,210 (3.1)   | 23,094 (3.3)   | 1%  | 16,167 (3.2)   | 16,299 (3.2)   | 0% |
| Chronic kidney disease††                    | 27,800 (4.5)   | 36,539 (5.2)   | 3%  | 25,543 (5.1)   | 25,543 (5.1)   | 0% |
| Congestive heart failure                    | 61,351 (10.0)  | 77,802 (11.0)  | 4%  | 56,214 (11.2)  | 56,214 (11.2)  | 0% |
| Coronary artery disease‡‡                   | 158,521 (25.7) | 190,688 (27.0) | 3%  | 138,038 (27.4) | 138,038 (27.4) | 0% |
| Angina                                      | 117,261 (19.0) | 135,415 (19.2) | 0%  | 99,400 (19.7)  | 99,463 (19.7)  | 0% |
| Peripheral vascular disease                 | 8,365 (1.4)    | 10,267 (1.5)   | 1%  | 7,422 (1.5)    | 7,537 (1.5)    | 0% |
| Parkinson's disease                         | 8,858 (1.4)    | 13,096 (1.9)   | 3%  | 7,995 (1.6)    | 8,289 (1.6)    | 0% |
| Chronic lung disease                        | 177,653 (28.8) | 167,962 (23.8) | 11% | 138,346 (27.5) | 136,245 (27.1) | 1% |
| Atrial fibrillation/flutter                 | 25,513 (4.1)   | 39,678 (5.6)   | 7%  | 23,970 (4.8)   | 25,574 (5.1)   | 1% |
| Cancer§§                                    | 76,143 (12.4)  | 86,596 (12.3)  | 0%  | 62,477 (12.4)  | 62,302 (12.4)  | 0% |
| Alcoholism                                  | 3,578 (0.6)    | 4,757 (0.7)    | 1%  | 3,187 (0.6)    | 3,263 (0.6)    | 0% |
| Seizure                                     | 3,058 (0.5)    | 4,290 (0.6)    | 2%  | 2,772 (0.6)    | 2,936 (0.6)    | 0% |
| Acute kidney injury                         | 6,238 (1.0)    | 9,090 (1.3)    | 3%  | 5,849 (1.2)    | 6,079 (1.2)    | 0% |
| Acute myocardial infarction                 | 18,673 (3.0)   | 23,811 (3.4)   | 2%  | 16,863 (3.3)   | 16,947 (3.4)   | 0% |
| Pacemaker                                   | 23,606 (3.8)   | 31,405 (4.5)   | 3%  | 21,185 (4.2)   | 21,497 (4.3)   | 0% |
| Hospitalization with hyperkalemia           | 2,607 (0.4)    | 3,358 (0.5)    | 1%  | 2,374 (0.5)    | 2,422 (0.5)    | 0% |
| Hypotension                                 | 6,289 (1.0)    | 8,542 (1.2)    | 2%  | 5,661 (1.1)    | 5,838 (1.2)    | 0% |
| Prostatic hyperplasia                       | 72,621 (11.8)  | 90,528 (12.8)  | 3%  | 61,284 (12.2)  | 61,487 (12.2)  | 0% |
| Prostatitis                                 | 28,193 (4.6)   | 33,028 (4.7)   | 1%  | 23,411 (4.6)   | 23,426 (4.7)   | 0% |
| Acute urinary retention                     | 7,970 (1.3)    | 10,869 (1.5)   | 2%  | 7,068 (1.4)    | 7,248 (1.4)    | 0% |
| DVT/PE                                      | 942 (0.2)      | 1,611 (0.2)    | 2%  | 892 (0.2)      | 1,005 (0.2)    | 1% |
| Charlson comorbidity index                  |                |                |     |                |                |    |
| 0                                           | 394,182 (64.0) | 441,541 (62.6) | 3%  | 396,258 (78.7) | 394,517 (78.3) | 1% |
| 1                                           | 151,182 (24.5) | 173,421 (24.6) | 0%  | 44,718 (8.9)   | 45,227 (9.0)   | 0% |
| 2                                           | 36,695 (6.0)   | 44,093 (6.3)   | 1%  | 31,456 (6.2)   | 31,689 (6.3)   | 0% |
| ≥ 3                                         | 34,300 (5.6)   | 46,077 (6.5)   | 4%  | 31,180 (6.2)   | 32,179 (6.4)   | 1% |
| Johns Hopkins Aggregated Diagnosis Groups   |                |                |     |                |                |    |
| 0                                           | 14,708 (2.4)   | 18,706 (2.7)   | 2%  | 12,004 (2.4)   | 11,646 (2.3)   | 0% |
| 1-2                                         | 107,191 (17.4) | 129,336 (18.3) | 2%  | 87,530 (17.4)  | 87,189 (17.3)  | 0% |
| 3-5                                         | 256,541 (41.6) | 289,615 (41.1) | 1%  | 207,832 (41.3) | 207,381 (41.2) | 0% |
| ≥ 6                                         | 237,919 (38.6) | 267,475 (37.9) | 1%  | 196,246 (39.0) | 197,396 (39.2) | 0% |
| <b>Medication use¶¶</b>                     |                |                |     |                |                |    |
| Antiarrhythmic                              | 8,265 (1.3)    | 13,318 (1.9)   | 4%  | 7,897 (1.6)    | 8,306 (1.6)    | 1% |
| Antipsychotic                               | 15,803 (2.6)   | 24,798 (3.5)   | 6%  | 14,803 (2.9)   | 15,909 (3.2)   | 1% |
| Proton pump inhibitor                       | 113,986 (18.5) | 127,557 (18.1) | 1%  | 94,018 (18.7)  | 94,081 (18.7)  | 0% |
| Antiemetic                                  | 3,353 (0.5)    | 4,417 (0.6)    | 1%  | 2,971 (0.6)    | 3,137 (0.6)    | 0% |

|                                            |                |                |     |                |                |    |
|--------------------------------------------|----------------|----------------|-----|----------------|----------------|----|
| Lithium                                    | 1,230 (0.2)    | 1,737 (0.2)    | 1%  | 1,071 (0.2)    | 1,079 (0.2)    | 0% |
| Antilipemic                                | 221,688 (36.0) | 272,129 (38.6) | 5%  | 188,554 (37.4) | 189,507 (37.6) | 0% |
| Antihypertensive                           | 378,579 (61.4) | 441,513 (62.6) | 2%  | 315,012 (62.6) | 316,392 (62.8) | 1% |
| Potassium sparing diuretic                 | 7,394 (1.2)    | 7,828 (1.1)    | 1%  | 5,943 (1.2)    | 5,882 (1.2)    | 0% |
| H2RA                                       | 45,412 (7.4)   | 49,780 (7.1)   | 1%  | 37,562 (7.5)   | 38,034 (7.6)   | 0% |
| Prokinetic                                 | 12,338 (2.0)   | 14,799 (2.1)   | 1%  | 10,793 (2.1)   | 10,792 (2.1)   | 0% |
| QT-prolonging                              | 79,216 (12.9)  | 96,628 (13.7)  | 3%  | 68,376 (13.6)  | 68,376 (13.6)  | 0% |
| Antidiabetic                               | 86,160 (14.0)  | 107,168 (15.2) | 3%  | 74,116 (14.7)  | 75,326 (15.0)  | 1% |
| Acetylsalicylic acid                       | 45,102 (7.3)   | 50,932 (7.2)   | 0%  | 38,140 (7.6)   | 38,469 (7.6)   | 0% |
| Anticoagulant***                           | 1,097 (0.2)    | 1,913 (0.3)    | 2%  | 1,053 (0.2)    | 1,116 (0.2)    | 0% |
| Antiplatelet                               | 21,137 (3.4)   | 26,750 (3.8)   | 2%  | 18,705 (3.7)   | 18,835 (3.7)   | 0% |
| Tricyclic antidepressant                   | 16,779 (2.7)   | 18,043 (2.6)   | 1%  | 13,898 (2.8)   | 13,639 (2.7)   | 0% |
| Opioid                                     | 144 (0.0)      | 152 (0.0)      | 0%  | 115 (0.0)      | 121 (0.0)      | 0% |
| Antimalarian                               | 4,165 (0.7)    | 3,976 (0.6)    | 1%  | 3,218 (0.6)    | 3,126 (0.6)    | 0% |
| Antiviral                                  | 70 (0.0)       | 78 (0.0)       | 0%  | 59 (0.0)       | 57 (0.0)       | 0% |
| Antineoplastic                             | 18,251 (3.0)   | 19,862 (2.8)   | 1%  | 14,617 (2.9)   | 14,760 (2.9)   | 0% |
| Benzodiazepine                             | 95,661 (15.5)  | 106,325 (15.1) | 1%  | 78,922 (15.7)  | 79,561 (15.8)  | 0% |
| NSAID†††                                   | 96,993 (15.7)  | 102,468 (14.5) | 3%  | 77,699 (15.4)  | 77,092 (15.3)  | 0% |
| Cholinesterase inhibitor                   | 0 (0.0)        | 0 (0.0)        | 0%  | -              | -              | -  |
| Anticonvulsant                             | 12,039 (2.0)   | 17,052 (2.4)   | 3%  | 10,861 (2.2)   | 11,419 (2.3)   | 1% |
| ACE/ARB                                    | 244,089 (39.6) | 286,273 (40.6) | 2%  | 203,598 (40.4) | 204,220 (40.6) | 0% |
| Beta-adrenergic antagonist                 | 143,479 (23.3) | 175,820 (24.9) | 4%  | 122,840 (24.4) | 123,696 (24.6) | 0% |
| Calcium channel blocker                    | 137,188 (22.3) | 162,728 (23.1) | 2%  | 115,643 (23.0) | 116,434 (23.1) | 0% |
| Non-potassium sparing diuretic             | 140,191 (22.7) | 164,702 (23.4) | 1%  | 117,731 (23.4) | 118,689 (23.6) | 0% |
| Statin                                     | 206,154 (33.4) | 253,885 (36.0) | 5%  | 175,534 (34.9) | 176,476 (35.0) | 0% |
| Antiparkinson drug                         | 7,655 (1.2)    | 11,610 (1.6)   | 3%  | 6,976 (1.4)    | 7,263 (1.4)    | 0% |
| Digoxin                                    | 16,465 (2.7)   | 27,748 (3.9)   | 7%  | 15,850 (3.1)   | 17,362 (3.4)   | 2% |
| Overactive bladder medication              | 11,989 (1.9)   | 15,337 (2.2)   | 2%  | 10,306 (2.0)   | 10,385 (2.1)   | 0% |
| Warfarin                                   | 28,511 (4.6)   | 52,322 (7.4)   | 12% | 27,911 (5.5)   | 31,117 (6.2)   | 3% |
| Inhaler - acetylcholine                    | 26,454 (4.3)   | 26,784 (3.8)   | 3%  | 21,534 (4.3)   | 21,606 (4.3)   | 0% |
| Inhaler - corticosteroid                   | 38,465 (6.2)   | 32,138 (4.6)   | 7%  | 28,792 (5.7)   | 27,560 (5.5)   | 1% |
| Inhaler - beta-agonist                     | 71,383 (11.6)  | 61,638 (8.7)   | 9%  | 54,089 (10.7)  | 52,530 (10.4)  | 1% |
| Smoking cessation aid                      | 213 (0.0)      | 220 (0.0)      | 0%  | 162 (0.0)      | 164 (0.0)      | 0% |
| <b>Health care use†††</b>                  |                |                |     |                |                |    |
| GP/FP visits                               | 588,000 (95.4) | 671,789 (95.3) | 1%  | 480,748 (95.5) | 481,050 (95.5) | 0% |
| <b>Specialist consultations</b>            |                |                |     |                |                |    |
| Nephrologist consults                      | 23,354 (3.8)   | 31,104 (4.4)   | 3%  | 20,866 (4.1)   | 21,237 (4.2)   | 0% |
| Cardiologist consults                      | 192,925 (31.3) | 233,623 (33.1) | 4%  | 163,132 (32.4) | 164,185 (32.6) | 0% |
| <b>Prior investigations and treatments</b> |                |                |     |                |                |    |
| Carotid ultrasound                         | 23,718 (3.8)   | 27,395 (3.9)   | 0%  | 19,805 (3.9)   | 19,657 (3.9)   | 0% |
| Cardiac catheterization                    | 7,618 (1.2)    | 10,102 (1.4)   | 2%  | 6,875 (1.4)    | 7,053 (1.4)    | 0% |
| Coronary angiogram                         | 8,845 (1.4)    | 11,493 (1.6)   | 2%  | 7,944 (1.6)    | 8,096 (1.6)    | 0% |
| Echocardiography                           | 76,276 (12.4)  | 95,002 (13.5)  | 3%  | 65,733 (13.1)  | 66,452 (13.2)  | 0% |
| EEG                                        | 2,452 (0.4)    | 3,074 (0.4)    | 1%  | 2,098 (0.4)    | 2,099 (0.4)    | 0% |
| Holter monitoring                          | 27,888 (4.5)   | 35,025 (5.0)   | 2%  | 23,889 (4.7)   | 24,311 (4.8)   | 0% |
| Cardiac stress test                        | 59,803 (9.7)   | 68,956 (9.8)   | 0%  | 49,842 (9.9)   | 49,678 (9.9)   | 0% |

|                                                  |                |                |     |                |                |    |
|--------------------------------------------------|----------------|----------------|-----|----------------|----------------|----|
| Coronary revascularization                       | 4,282 (0.7)    | 5,866 (0.8)    | 2%  | 3,917 (0.8)    | 4,044 (0.8)    | 0% |
| Electrocardiography                              | 270,574 (43.9) | 319,725 (45.3) | 3%  | 225,533 (44.8) | 226,738 (45.0) | 0% |
| Colorectal cancer screening                      | 120,943 (19.6) | 135,540 (19.2) | 1%  | 96,970 (19.3)  | 96,028 (19.1)  | 0% |
| Cervical cancer screening                        | 50,974 (8.3)   | 52,085 (7.4)   | 3%  | 39,122 (7.8)   | 38,535 (7.7)   | 0% |
| PSA test                                         | 11,272 (1.8)   | 16,987 (2.4)   | 4%  | 10,216 (2.0)   | 10,024 (2.0)   | 0% |
| Mammography                                      | 62,602 (10.2)  | 62,137 (8.8)   | 5%  | 48,148 (9.6)   | 47,222 (9.4)   | 1% |
| Influenza vaccination                            | 330,636 (53.6) | 372,220 (52.8) | 2%  | 269,517 (53.5) | 269,306 (53.5) | 0% |
| Bone mineral density test                        | 78,822 (12.8)  | 82,424 (11.7)  | 3%  | 61,728 (12.3)  | 60,823 (12.1)  | 1% |
| Hearing test                                     | 28,892 (4.7)   | 32,190 (4.6)   | 1%  | 23,566 (4.7)   | 23,393 (4.6)   | 0% |
| Cystoscopy                                       | 16,682 (2.7)   | 21,408 (3.0)   | 2%  | 14,405 (2.9)   | 14,577 (2.9)   | 0% |
| Transurethral resection of the prostate          | 1,314 (0.2)    | 1,869 (0.3)    | 1%  | 1,169 (0.2)    | 1,211 (0.2)    | 0% |
| CT of the head                                   | 36,303 (5.9)   | 47,676 (6.8)   | 4%  | 31,556 (6.3)   | 32,637 (6.5)   | 1% |
| CT of other areas                                | 53,665 (8.7)   | 63,780 (9.0)   | 1%  | 45,195 (9.0)   | 45,595 (9.1)   | 0% |
| Chest x-ray                                      | 25,312 (4.1)   | 22,786 (3.2)   | 5%  | 19,484 (3.9)   | 19,263 (3.8)   | 0% |
| Pulmonary function test                          | 50,909 (8.3)   | 51,816 (7.3)   | 3%  | 40,495 (8.0)   | 40,142 (8.0)   | 0% |
| At-home physician service                        | 16,262 (2.6)   | 19,799 (2.8)   | 1%  | 14,109 (2.8)   | 14,329 (2.8)   | 0% |
| Urinalysis                                       | 9,521 (1.5)    | 34,249 (4.9)   | 19% | 9,520 (1.9)    | 9,786 (1.9)    | 0% |
| Sputum                                           | 483 (0.1)      | 399 (0.1)      | 1%  | 367 (0.1)      | 356 (0.1)      | 0% |
| <b>Kidney function§§§</b>                        |                |                |     |                |                |    |
| Baseline SCr concentration, median (IQR), µmol/L | 78 (66-93)     | 79 (67-94)     | 4%  | 79 (67-93)     | 78 (66-93)     | 1% |
| eGFR, median (IQR), mL/min/1.73 m <sup>2</sup>   | 74 (61-86)     | 74 (61-86)     | 2%  | 74 (61-86)     | 74 (61-86)     | 1% |
| eGFR                                             |                |                |     |                |                |    |
| ≥ 60 mL/min/1.73 m <sup>2</sup>                  | 81,332 (13.2)  | 95,913 (13.6)  | 1%  | 66,755 (13.3)  | 66,942 (13.3)  | 0% |
| 45-59 mL/min/1.73 m <sup>2</sup>                 | 16,125 (2.6)   | 19,597 (2.8)   | 1%  | 13,793 (2.7)   | 13,534 (2.7)   | 0% |
| 30-44 mL/min/1.73 m <sup>2</sup>                 | 6,352 (1.0)    | 8,217 (1.2)    | 1%  | 5,630 (1.1)    | 5,637 (1.1)    | 0% |
| 15-29 mL/min/1.73 m <sup>2</sup>                 | 1,735 (0.3)    | 2,478 (0.4)    | 1%  | 1,581 (0.3)    | 1,661 (0.3)    | 0% |
| < 15 mL/min/1.73 m <sup>2</sup>                  | 226 (0.0)      | 310 (0.0)      | 0%  | 217 (0.0)      | 202 (0.0)      | 0% |
| Urine dipstick protein¶¶¶                        |                |                |     |                |                |    |
| Negative (≤ 0.3 g/L)                             | 612 (0.1)      | 803 (0.1)      | 0%  | 533 (0.1)      | 508 (0.1)      | 0% |
| 0.3 g/L - 1.0 g/L                                | 8,734 (1.4)    | 10,935 (1.6)   | 1%  | 7,362 (1.5)    | 7,372 (1.5)    | 0% |
| 1.0 g/L - 3.0 g/L                                | 6,985 (1.1)    | 8,933 (1.3)    | 1%  | 5,926 (1.2)    | 6,148 (1.2)    | 0% |
| ≥ 3.0 g/L                                        | 6,250 (1.0)    | 8,444 (1.2)    | 2%  | 5,517 (1.1)    | 5,711 (1.1)    | 0% |

Abbreviations: ACE = angiotensin-converting enzyme, ARB = angiotensin II receptor blocker, CKD-EPI = Chronic Kidney Disease Epidemiology Collaboration, DVT/PE = deep vein thrombosis/pulmonary embolism, eGFR = estimated glomerular filtration rate, GP/FP = general practitioner/family practitioner, H2RA = Histamine H2 receptor antagonist, IQR = interquartile range, LHIN = Local Health Integration Network, NSAID = non-steroidal anti-inflammatory drug, SCr = serum creatinine, SD = standard deviation

\*Data are presented as the number (percentage) of patients, unless otherwise reported.

†Standardized differences are less sensitive to sample size than traditional hypothesis tests. They provide a measure of the difference between groups divided by the pooled standard deviation; a value greater than 10% (0.1) is interpreted as a meaningful difference between the groups<sup>1</sup>.

‡Income was categorized into fifths of average neighborhood income on the index date. Income was not available for 2,160 (0.4%) macrolide antibiotic users and 2,468 (0.4%) non-macrolide antibiotic users in the unmatched cohort. Missing values in the unmatched cohort were re-classified into income quintile 3 during matching.

§Rural residence was defined as a population < 10,000 people. Residential information was not available for 647 (0.1%) macrolide antibiotic users and 708 (0.1%) non-macrolide antibiotic users in the unmatched cohort. Missing values in the unmatched cohort were re-classified into the "No" category during matching.

||LHIN refers to health authorities responsible for regional administration of public healthcare services in Ontario. LHIN was not available for 619 (0.1%) macrolide antibiotic users and 684 (0.1%) non-macrolide antibiotic users in the unmatched cohort and 500 (0.1%) macrolide users and 480 (0.1%) non-macrolide antibiotic users in the matched cohort.

¶Prescriber information was not available for 100,111 (16.2%) macrolide antibiotic users and 262,915 (37.3%) non-macrolide antibiotic users in the unmatched cohort and 100,093 (19.9%) macrolide antibiotic users and 95,973 (19.1%) non-macrolide antibiotic users in the matched cohort.

\*\*Comorbid conditions in the five years preceding the index date were considered.

††We identified chronic kidney disease using an algorithm of hospital diagnostic diagnosis codes validated for older adults in our region<sup>2</sup>. The presence of codes in this algorithm is associated with a median eGFR of 38 mL/min per 1.73 m<sup>2</sup> (IQR 27 to 52 mL/min per 1.73 m<sup>2</sup>), whereas an absence of codes is associated with a median eGFR of 69 mL/min per 1.73 m<sup>2</sup> (IQR 56 to 82 mL/min per 1.73 m<sup>2</sup>).

‡‡Coronary artery disease included receipt of coronary artery bypass graft surgery and percutaneous coronary intervention.

§§Major cancers included esophagus, lung, bowel, liver, pancreas, breast, male/female reproductive organs, as well as leukemias and lymphomas.

|||Charlson comorbidity index<sup>3,4</sup> was calculated using five years of hospitalization data. "No hospitalizations" received a score of 0.

¶¶Baseline medication use in the 120 days preceding the index date was considered.

\*\*\*Excludes warfarin.

†††Excludes acetylsalicylic acid.

‡‡‡Chest x-ray, urinalysis and sputum were assessed in the seven days preceding the index date. All other health care use was assessed in the one year preceding the index date.

§§§Baseline serum creatinine measurements were taken in routine care a median of 131 days (IQR 59 to 227 days) and 126 days (IQR 57 to 224 days) prior to the index date for macrolide antibiotic users and non-macrolide antibiotic users, respectively, in the unmatched cohort and 129 days (IQR 59 to 225 days) and 127 days (IQR 58 to 224 days) prior to the index date for macrolide antibiotic users and non-macrolide antibiotic users, respectively, in the matched cohort.

||||eGFR was calculated using the CKD-EPI equation<sup>5</sup>:  $141 \times \min([\text{serum creatinine concentration in } \mu\text{mol/L}/88.4]/\kappa, 1)^\alpha \times \max([\text{serum creatinine concentration in } \mu\text{mol/L}/88.4]/\kappa, 1)^{-1.209} \times 0.993^{\text{Age}} \times 1.018$  [if female]  $\times 1.159$  [if African-American];  $\kappa=0.7$  if female and 0.9 if male;  $\alpha=-0.329$  if female and -0.411 if male; min=the minimum of serum creatinine concentration/ $\kappa$  or 1; max=the maximum of serum creatinine concentration/ $\kappa$  or 1. Information on race was not available in our data sources and all patients were assumed not to be of African-Canadian race; African-Canadians represented less than 5% of the population of Ontario in 2006<sup>6</sup>.

¶¶¶Urine dipstick protein measurements were available for 22,581 (3.7%) macrolide antibiotic users and 29,115 (4.1%) non-macrolide antibiotic users in the unmatched cohort and 19,338 (3.8%) macrolide antibiotic users and 19,739 (3.9%) non-macrolide antibiotic users in the matched cohort.

## References

1. Austin PC. Using the standardized difference to compare the prevalence of a binary variable between two groups in observational research. *Commun Stat Simul Comput* 2009;38:1228-34.
2. Fleet JL, Dixon SN, Shariff SZ, et al. Detecting chronic kidney disease in population-based administrative databases using an algorithm of hospital encounter and physician claim codes. *BMC Nephrol* 2013;14:81.
3. Charlson ME, Pompei P, Ales KL, et al. A new method of classifying prognostic comorbidity in longitudinal studies: development and validation. *J Chronic Dis* 1987;40:373-83.
4. Quan H, Sundararajan V, Halfon P, et al. Coding algorithms for defining comorbidities in ICD-9-CM and ICD-10 administrative data. *Med Care* 2005;43:1130-9.
5. Levey AS, Stevens LA, Schmid CH, et al. A new equation to estimate glomerular filtration rate. *Ann Intern Med* 2009;150:604-12.
6. Statistics Canada. Ethnic origin and visible minorities. 2006.
